# Supplementary material for: Investigation of the highly tunable selectivity to linear α-olefins in Fischer–Tropsch synthesis over silica-supported Co and CoMn catalysts by carburization–reduction pretreatment
Source: Royal Society of Chemistry journal article supplement (doi:10.1039/c7cy01764b), 2017-01-01
Supplement: c7cy01764b1.pdf [file c7cy01764b1.pdf]

## Supporting Information

### **Investigation of the highly tunable selectivity to linear $\alpha$ -olefins in Fischer-Tropsch synthesis over silica supported Co and CoMn catalysts by carburization-reduction pretreatment**

*Jiao Zheng, Jian Cai, Feng Jiang, Yuebing Xu and Xiaohao Liu\**

*Department of Chemical Engineering, School of Chemical and Material Engineering,  
Jiangnan University, Wuxi 214122, China*

*E-mail address: [liuxh@jiangnan.edu.cn](mailto:liuxh@jiangnan.edu.cn) (X.H. Liu)*

## Supplementary Figures and Tables

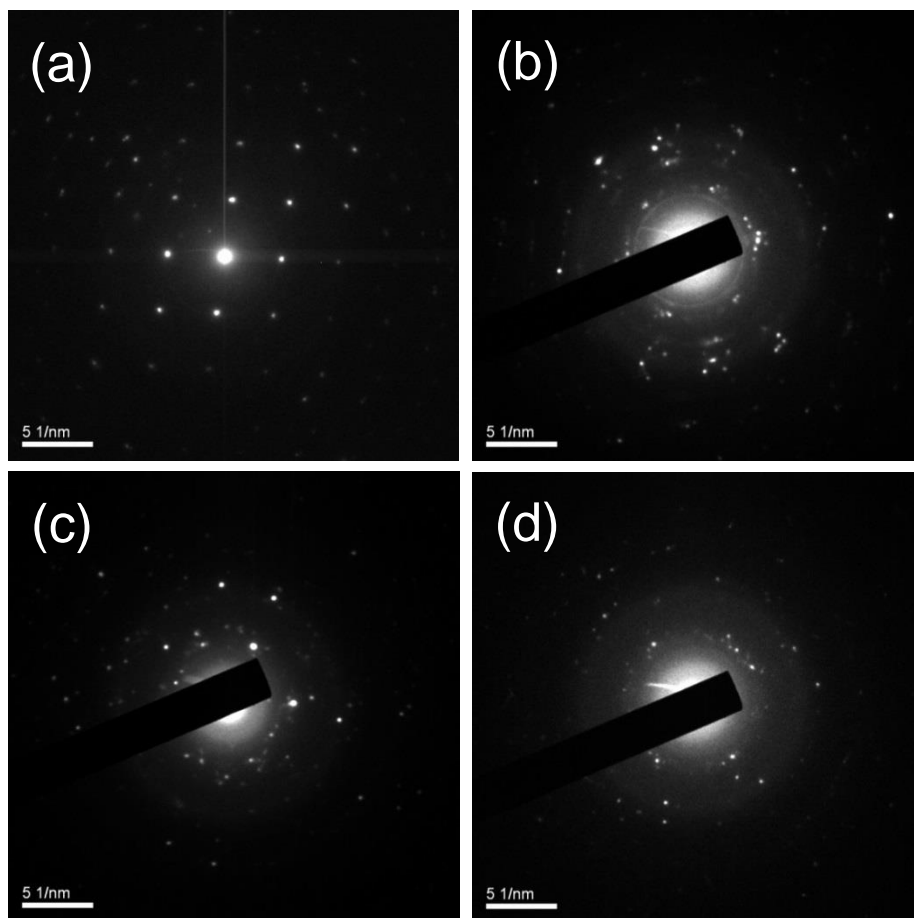

**Fig. S1** Rotation electron diffraction (ED) patterns of the  $15\text{Co}/\text{SiO}_2$  catalysts: (a) calcined  $15\text{Co}/\text{SiO}_2$ , (b)  $15\text{Co}/\text{SiO}_2\text{-R}$ , (c)  $15\text{Co}/\text{SiO}_2\text{-RC}$ , (d)  $15\text{Co}/\text{SiO}_2\text{-RCR}$ .

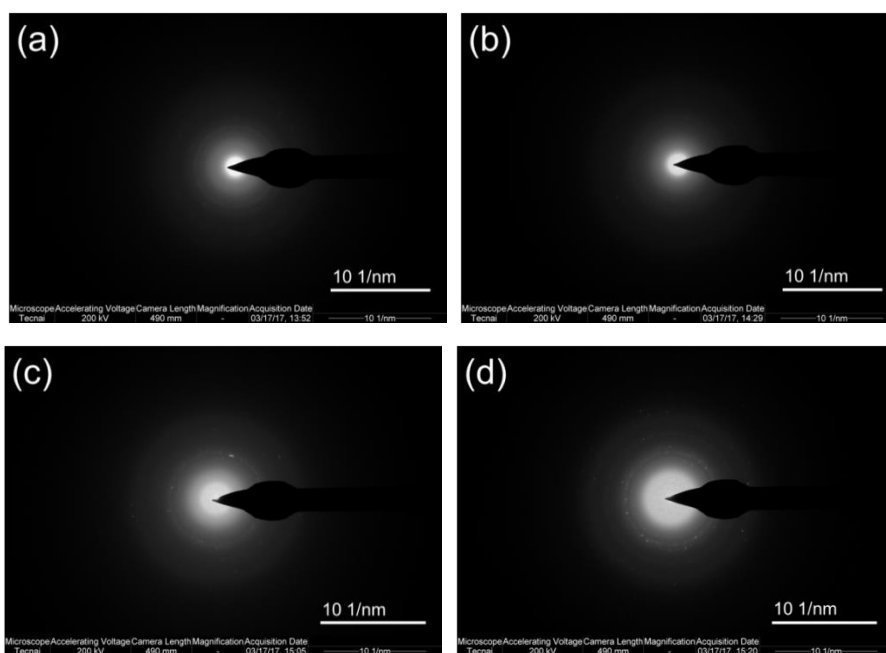

**Fig. S2** Rotation electron diffraction (ED) patterns of (a) calcined  $15\text{Co}_3.7\text{Mn}/\text{SiO}_2$ , (b)  $15\text{Co}_3.7\text{Mn}/\text{SiO}_2\text{-R}$ , (c)  $15\text{Co}_3.7\text{Mn}/\text{SiO}_2\text{-RC}$ , and (d)  $15\text{Co}_3.7\text{Mn}/\text{SiO}_2\text{-RCR}$  catalysts.

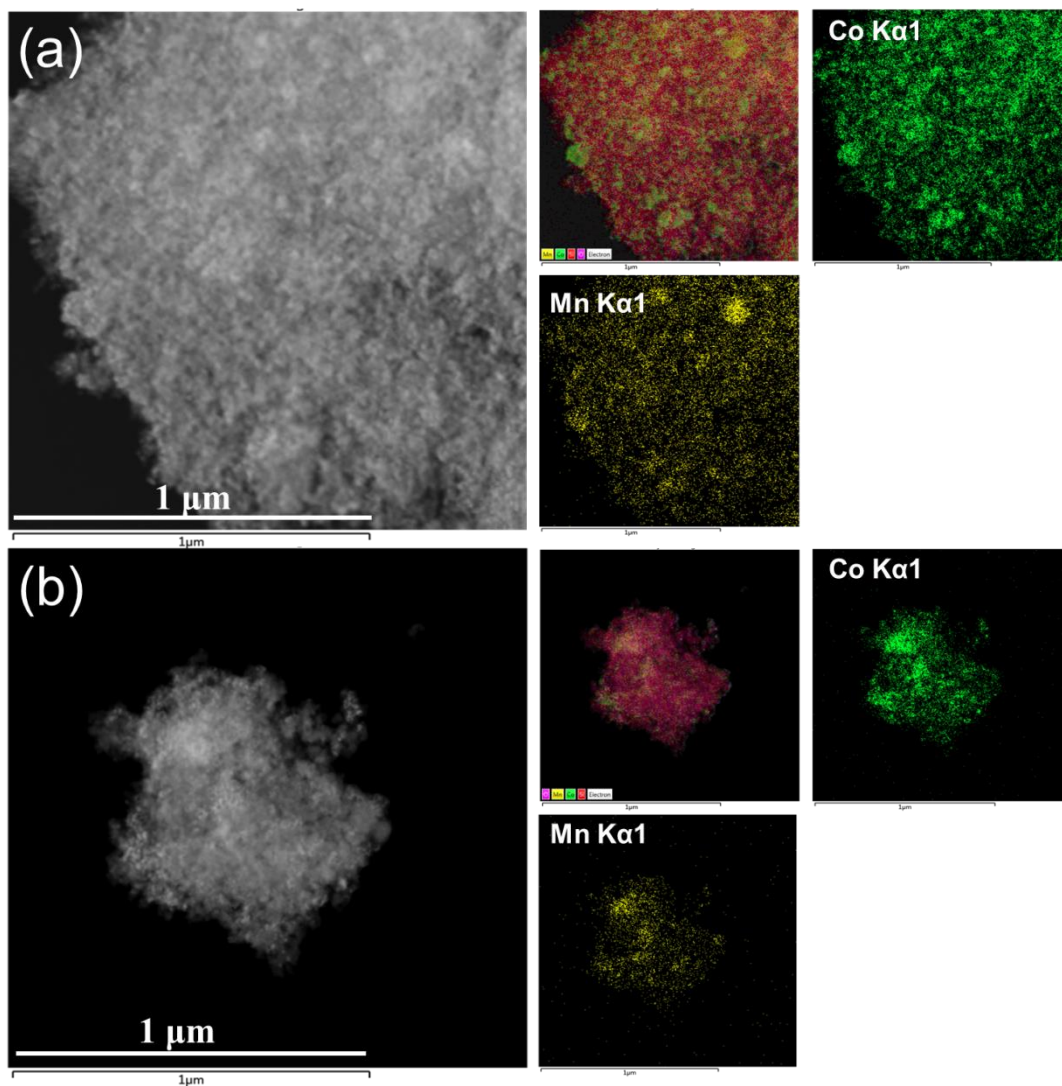

**Fig. S3** EDX mapping of the calcined  $15\text{Co}_3.7\text{Mn}/\text{SiO}_2$  (a), and  $15\text{Co}_3.7\text{Mn}/\text{SiO}_2\text{-R}$  (b).

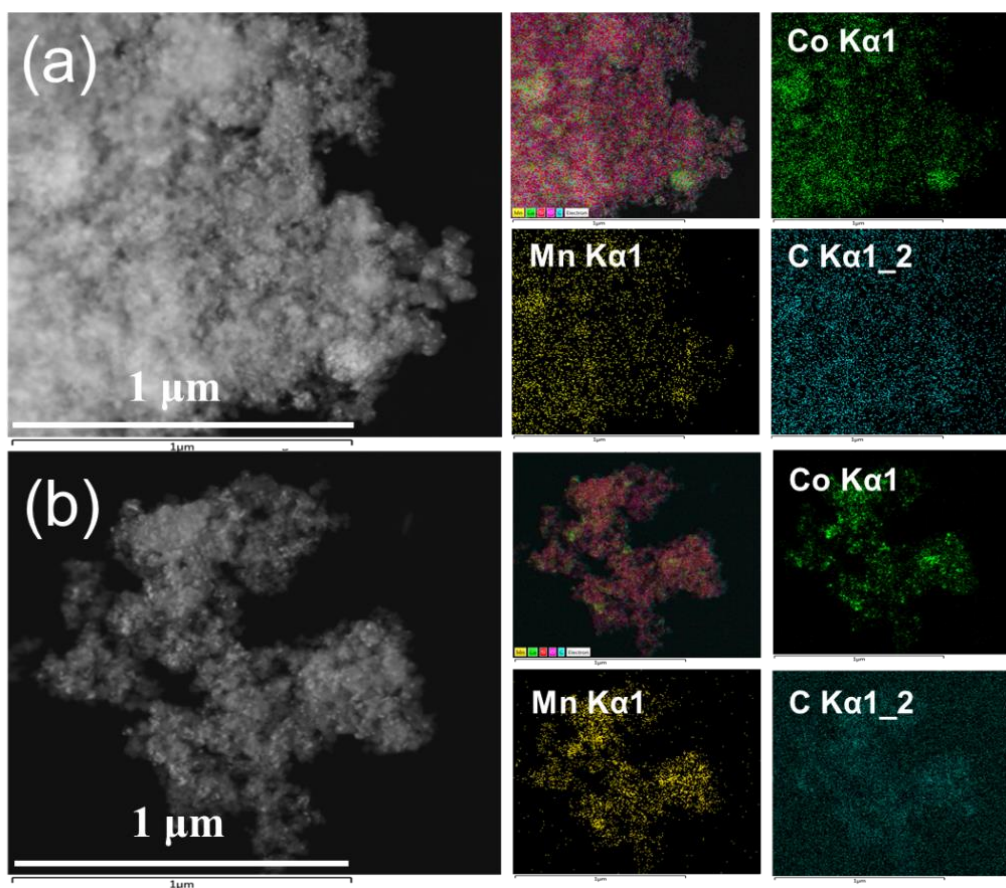

**Fig. S4** EDX mapping of (a) 15Co3.7Mn/SiO<sub>2</sub>-RC, and (b) 15Co3.7Mn/SiO<sub>2</sub>-RCR catalysts.

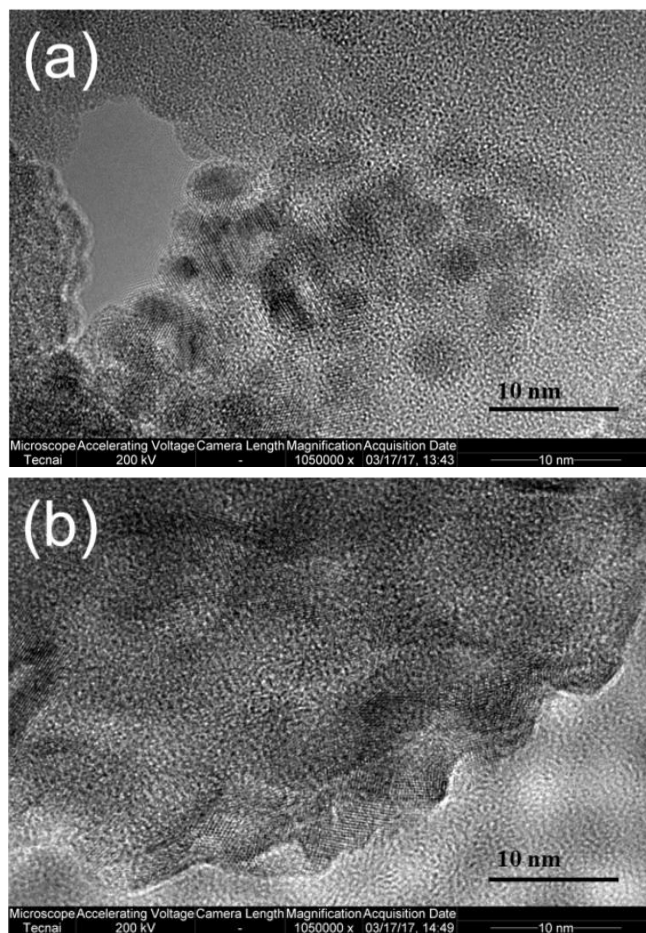

**Fig. S5** High resolution TEM images of (a) calcined  $15\text{Co}_{3.7}\text{Mn}/\text{SiO}_2$  and (b)  $15\text{Co}_{3.7}\text{Mn}/\text{SiO}_2\text{-RC}$  catalysts.

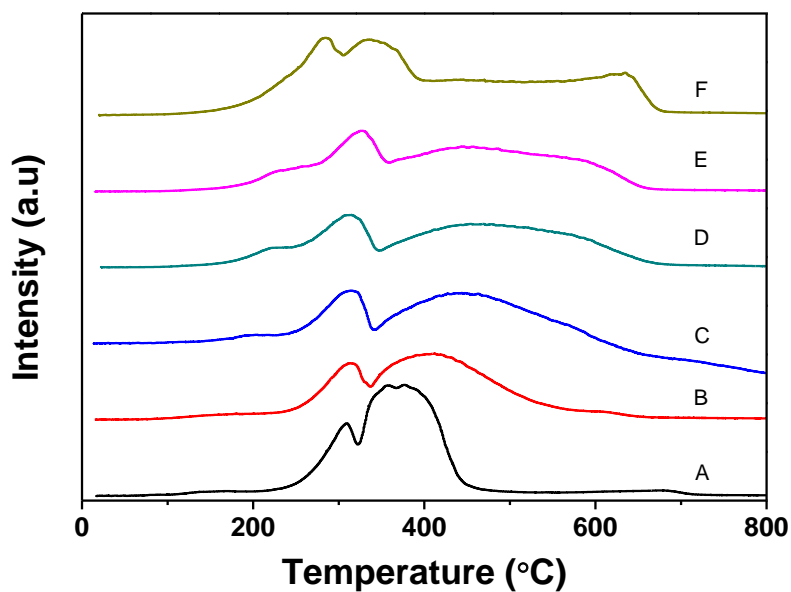

**Fig. S6** H<sub>2</sub>-TPR profiles for the Mn-promoted 15Co/SiO<sub>2</sub> catalysts: (A) 15Co/SiO<sub>2</sub>, (B) 15Co0.8Mn/SiO<sub>2</sub>, (C) 15Co1.7Mn/SiO<sub>2</sub>, (D) 15Co3.7Mn/SiO<sub>2</sub>, (E) 15Co5Mn/SiO<sub>2</sub>, (F) 15Co15Mn/SiO<sub>2</sub>.

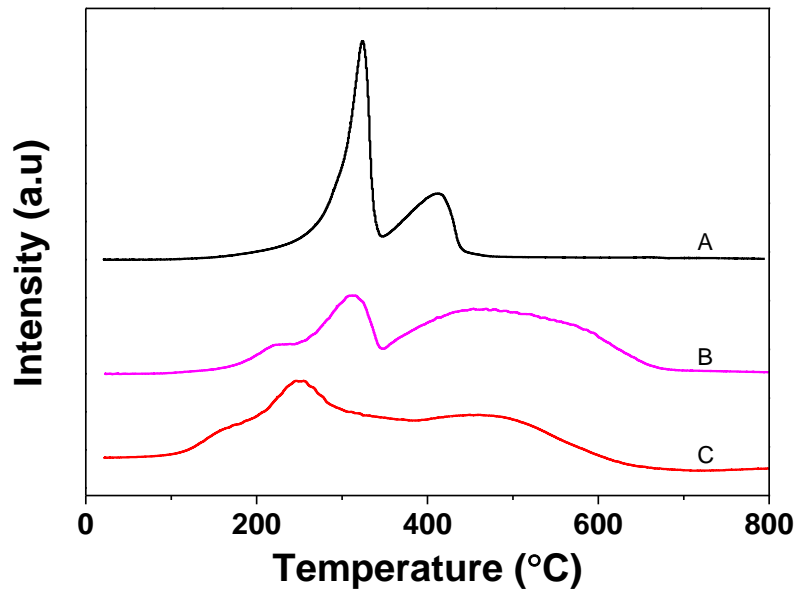

**Fig. S7** H<sub>2</sub>-TPR profiles for (A) calcined 15Mn/SiO<sub>2</sub>, (B) calcined 15Co3.7Mn/SiO<sub>2</sub>, and (C) 15Co3.7Mn/SiO<sub>2</sub>-RC catalysts.

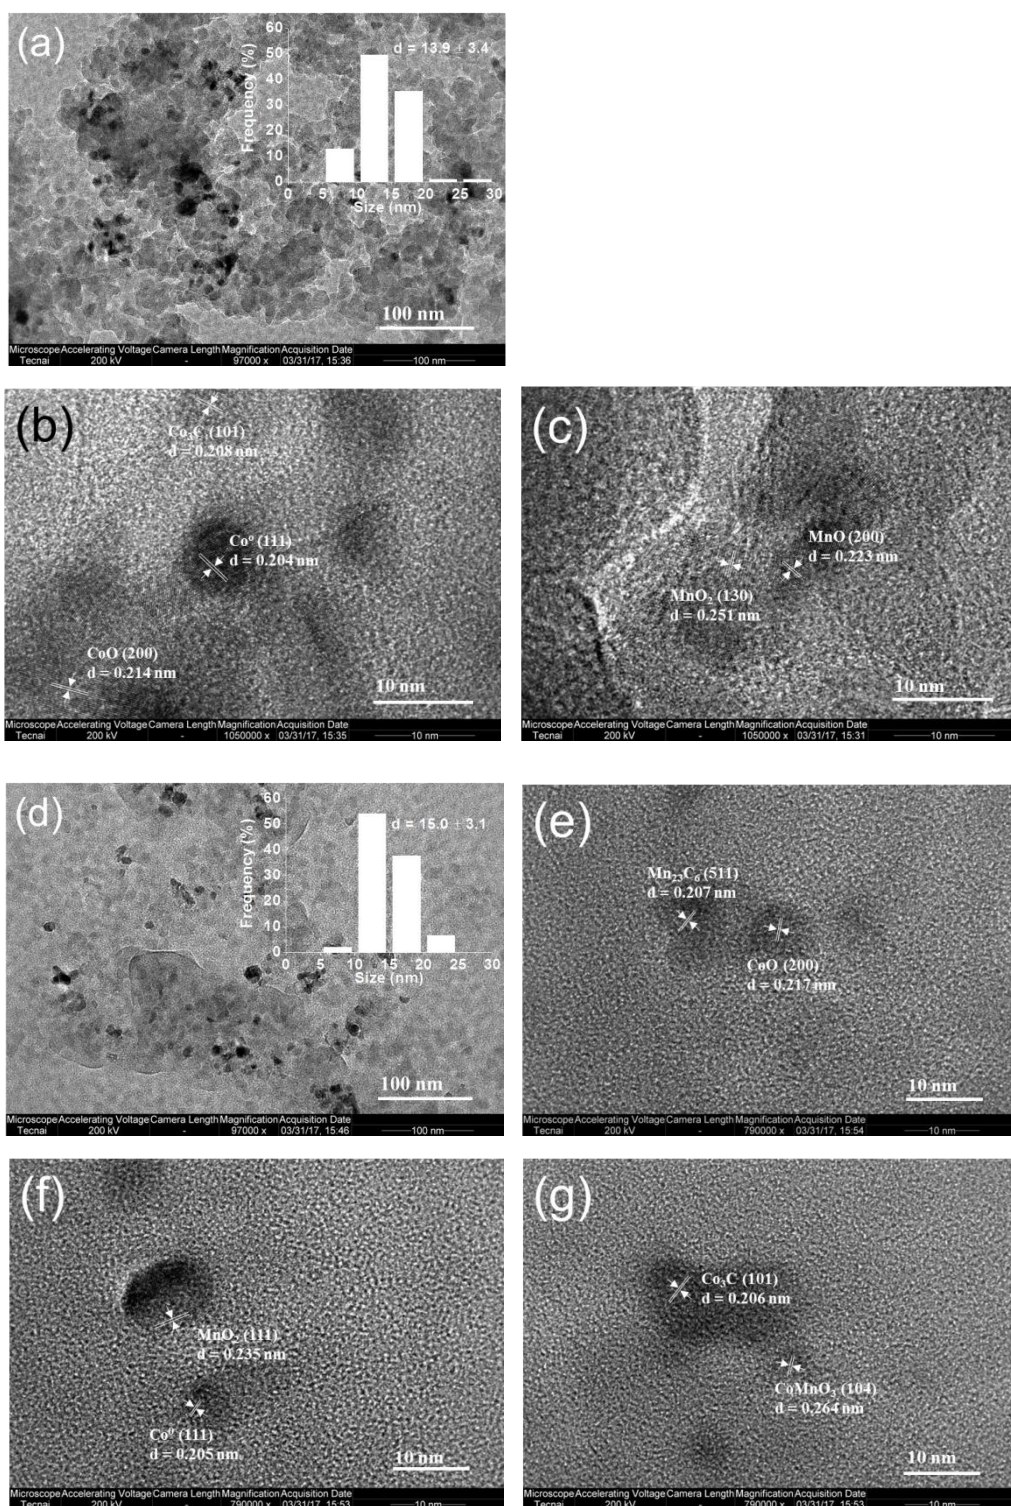

**Fig. S8** Low and high resolution TEM images for the spent 15Co3.7Mn/SiO<sub>2</sub> catalyst with TOS under the reaction conditions of T = 230 °C, P = 10 bar, H<sub>2</sub>/CO = 2, and GHSV = 4.5 L g<sub>cat</sub><sup>-1</sup> h<sup>-1</sup>: (a-c) t = 2 h; (d-g) t = 20 h.



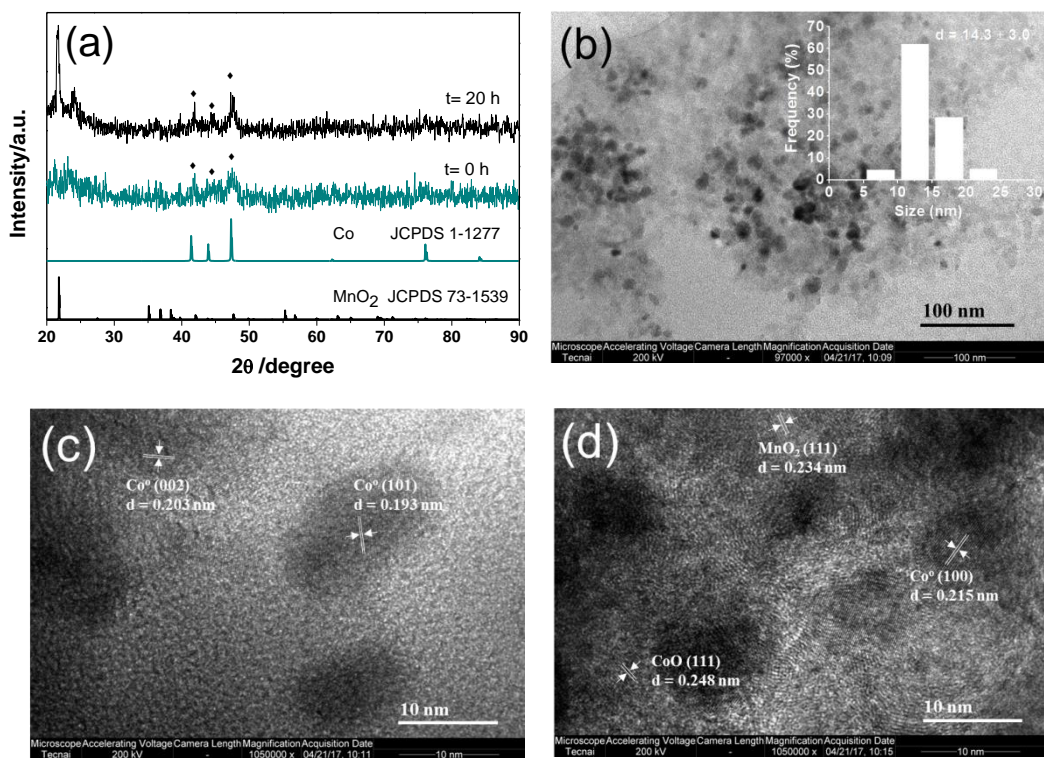

**Fig. S9** XRD diffraction patterns (a, t = 0, 20 h) and low and high resolution TEM images (b-d, t = 20 h) of the 15Co<sub>3.7</sub>Mn/SiO<sub>2</sub>-RCR catalyst with TOS under the reaction conditions of T = 230 °C, P = 10 bar, GHSV = 4.5 L g<sub>cat</sub><sup>-1</sup> h<sup>-1</sup>, and H<sub>2</sub>/CO = 2.

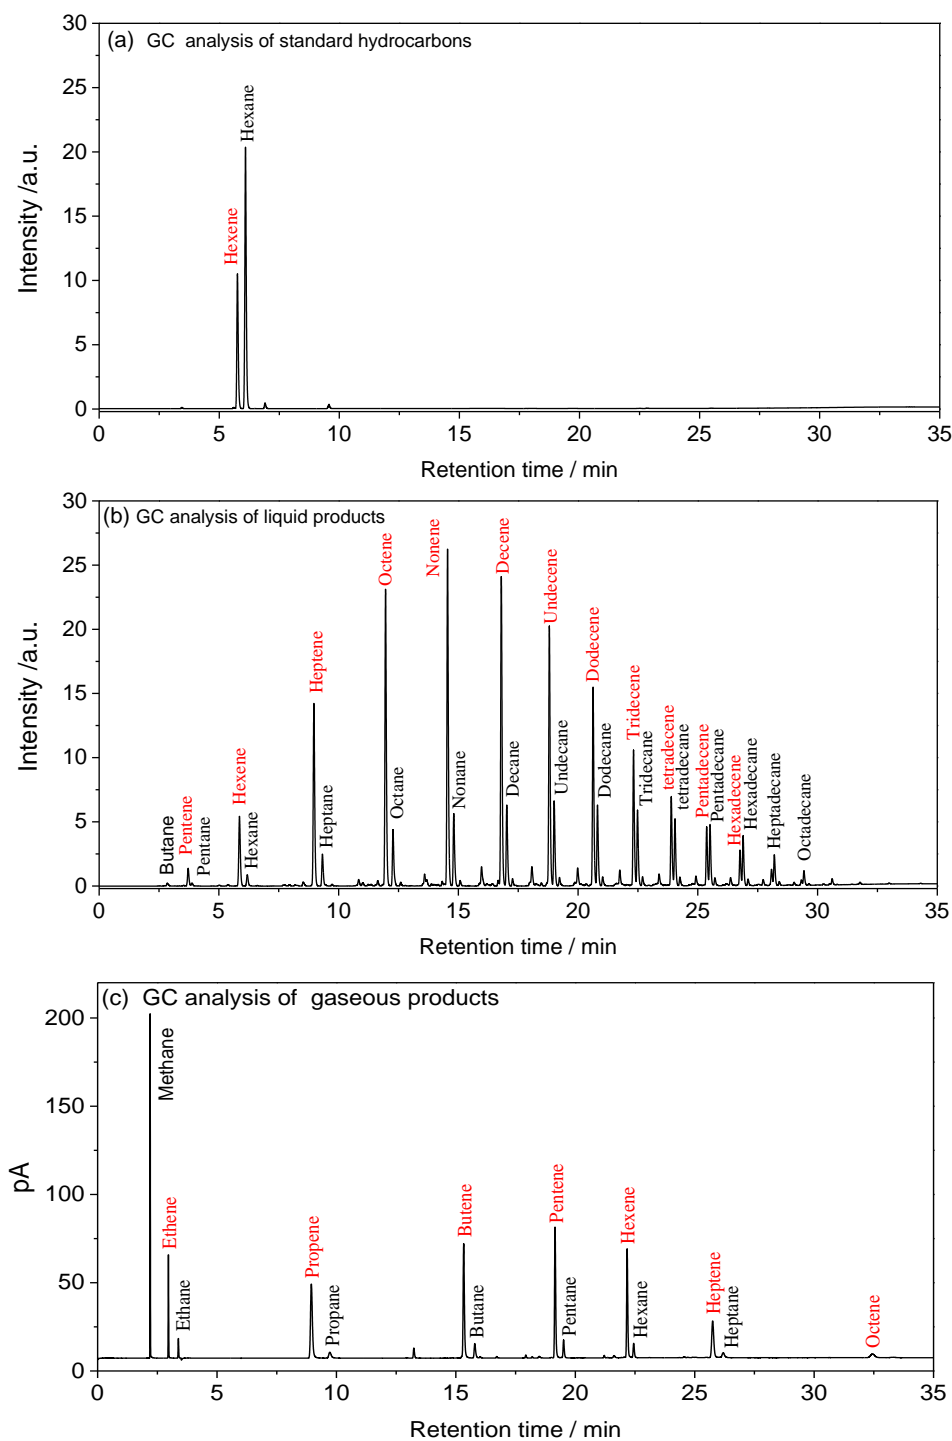

**Fig. S10** GC chart of (a) the standard hydrocarbons, (b) the FT liquid products, and (c) the FT gaseous products obtained from the FTS reaction over the  $15\text{Co}3.7\text{Mn}/\text{SiO}_2$  catalyst under the conditions of  $240\text{ }^\circ\text{C}$ , 10 bar, and  $\text{H}_2/\text{CO} = 0.5$ .

It is clearly shown in the GC chart that, in the case of the tested Co-based catalysts, the FT products mostly consist of the n-paraffins and  $\alpha$ -olefins, including very small amount of the iso-hydrocarbons and almost no internal olefins.

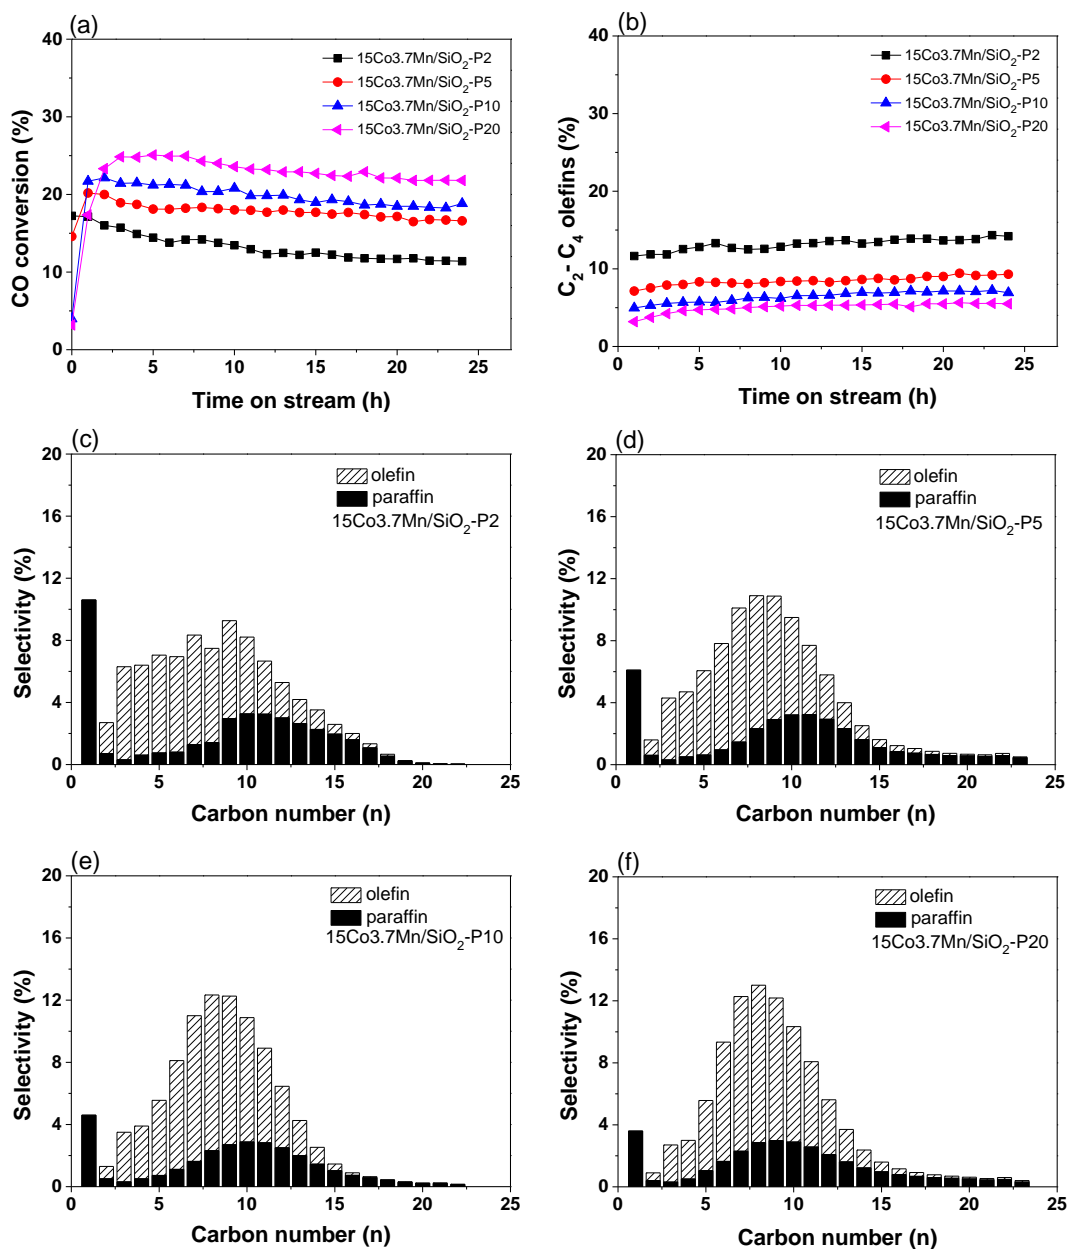

**Fig. S11** Influence of the reaction pressure on the CO conversion (a) and C<sub>2</sub>-C<sub>4</sub> selectivity (b) with time on stream, and products distribution (c-f) for the 15Co<sub>3.7</sub>Mn/SiO<sub>2</sub> catalyst.

**Table S1** Textural properties of the support and prepared cobalt catalysts.

| Sample                        | $S_{\text{BET}}$ ( $\text{m}^2/\text{g}$ ) | $D_{\text{pore}}$ (nm) | $V_{\text{pore}}$ ( $\text{cm}^3/\text{g}$ ) |
|-------------------------------|--------------------------------------------|------------------------|----------------------------------------------|
| Q-15                          | 186.8                                      | 25.1                   | 1.17                                         |
| 15Co/SiO <sub>2</sub>         | 153.5                                      | 25.2                   | 0.90                                         |
| 15Co/SiO <sub>2</sub> -R      | 153.8                                      | 22.0                   | 0.83                                         |
| 15Co3.7Mn/SiO <sub>2</sub>    | 158.3                                      | 21.8                   | 0.83                                         |
| 15Co3.7Mn/SiO <sub>2</sub> -R | 154.7                                      | 21.5                   | 0.81                                         |

**Table S2** The influence of pretreatment on the crystal facet and phase state of cobalt over the 15Co/SiO<sub>2</sub> catalyst.

| Sample                     | Nanoparticle                   | Crystal facet | Lattice distance (nm) |                         |                      |
|----------------------------|--------------------------------|---------------|-----------------------|-------------------------|----------------------|
|                            |                                |               | From XRD <sup>a</sup> | From HRTEM <sup>b</sup> | From ED <sup>c</sup> |
| 15Co/SiO <sub>2</sub>      | Co <sub>3</sub> O <sub>4</sub> | (311)         | 0.243                 | 0.252                   | 0.244                |
| 15Co/SiO <sub>2</sub> -R   | Co                             | (111)         | 0.205                 | 0.207                   | 0.212                |
| 15Co/SiO <sub>2</sub> -RC  | Co <sub>2</sub> C              | (111)         | 0.212                 | 0.205                   | 0.220                |
| 15Co/SiO <sub>2</sub> -RCR | Co                             | (101)         | 0.192                 | 0.189                   | 0.185                |
|                            | Co                             | (002)         | 0.203                 | 0.204                   | 0.203                |

<sup>a</sup> corresponding to Figure 1; <sup>b</sup> corresponding to Figure 3; <sup>c</sup> corresponding to Figure S1.

**Table S3** Cobalt particle size calculated from XRD patterns and TEM images of the pretreated 15Co/SiO<sub>2</sub> catalysts.

| Sample                     | Nanoparticle                   | Particle size (nm)       |                                      |
|----------------------------|--------------------------------|--------------------------|--------------------------------------|
|                            |                                | By XRD                   | By TEM                               |
| 15Co/SiO <sub>2</sub>      | Co <sub>3</sub> O <sub>4</sub> | 17.5 (13.1) <sup>a</sup> | 16.1 ± 5.0 (12.1 ± 5.0) <sup>a</sup> |
| 15Co/SiO <sub>2</sub> -R   | Co                             | 15.0                     | 15.5 ± 3.4                           |
| 15Co/SiO <sub>2</sub> -RC  | Co <sub>2</sub> C              | 17.1                     | 17.8 ± 4.6                           |
| 15Co/SiO <sub>2</sub> -RCR | Co                             | 19.7                     | 20.3 ± 6.4                           |

<sup>a</sup> Calculated from Co<sub>3</sub>O<sub>4</sub> particle,  $d(\text{Co}) = 0.75 \times d(\text{Co}_3\text{O}_4)$

**Table S4** Cobalt particle size calculated from XRD patterns and TEM images of the pretreated 15Co3.7Mn/SiO<sub>2</sub> catalysts.

| Sample                          | Nanoparticle                   | Particle size (nm)      |                                     |
|---------------------------------|--------------------------------|-------------------------|-------------------------------------|
|                                 |                                | By XRD                  | By TEM                              |
| 15Co3.7Mn/SiO <sub>2</sub>      | Co <sub>3</sub> O <sub>4</sub> | 13.0 (9.8) <sup>a</sup> | 10.0 ± 2.3 (7.5 ± 2.3) <sup>a</sup> |
| 15Co3.7Mn/SiO <sub>2</sub> -R   | Co                             | 14.6                    | 13.2 ± 2.5                          |
| 15Co3.7Mn/SiO <sub>2</sub> -RC  | Co <sub>2</sub> C              | 13.9                    | 12.7 ± 2.9                          |
| 15Co3.7Mn/SiO <sub>2</sub> -RCR | Co                             | 11.8                    | 12.4 ± 2.6                          |

<sup>a</sup> Calculated from Co<sub>3</sub>O<sub>4</sub> particle,  $d(\text{Co}) = 0.75 \times d(\text{Co}_3\text{O}_4)$

**Table S5** The influence of pretreatment on the crystal facet and phase state of cobalt over the 15Co3.7Mn/SiO<sub>2</sub> catalyst.

| Sample                          | Nanoparticle                   | Crystal facet | Lattice distance (nm) |                         |                      |
|---------------------------------|--------------------------------|---------------|-----------------------|-------------------------|----------------------|
|                                 |                                |               | From XRD <sup>a</sup> | From HRTEM <sup>b</sup> | From ED <sup>c</sup> |
| 15Co3.7Mn/SiO <sub>2</sub>      | Co <sub>3</sub> O <sub>4</sub> | (311)         | 0.243                 | 0.246                   | 0.248                |
| 15Co3.7Mn/SiO <sub>2</sub> -R   | Co                             | (111)         | 0.205                 | 0.209                   | 0.197                |
|                                 | CoO                            | (200)         | 0.213                 | 0.214                   | ---                  |
| 15Co3.7Mn/SiO <sub>2</sub> -RC  | Co <sub>2</sub> C              | (111)         | 0.212                 | 0.212                   | 0.227                |
| 15Co3.7Mn/SiO <sub>2</sub> -RCR | Co                             | (101)         | 0.192                 | 0.190                   | 0.172                |
|                                 | Co                             | (002)         | 0.206                 | 0.204                   | ---                  |
|                                 | Co                             | (100)         | 0.218                 | 0.216                   | ---                  |

<sup>a</sup>corresponding to Figure 2; <sup>b</sup>corresponding to Figure 4; <sup>c</sup>corresponding to Figure S2.

**Table S6** H<sub>2</sub> uptake and calculated cobalt reducibility over the Mn-promoted 15Co/SiO<sub>2</sub> catalysts.

| Sample                     | Co (wt%) | Mn (wt%) | H <sub>2</sub> uptake (mmol) <sup>a</sup> | Reducibility (%) <sup>b</sup> |
|----------------------------|----------|----------|-------------------------------------------|-------------------------------|
| 15Mn/SiO <sub>2</sub>      | 0        | 15       | 0.064                                     | 46.7 <sup>c</sup>             |
| 15Co/SiO <sub>2</sub>      | 15       | 0        | 0.099                                     | 58.5                          |
| 15Co0.8Mn/SiO <sub>2</sub> | 15       | 0.8      | 0.074                                     | 43.7 <sup>d</sup>             |
| 15Co1.7Mn/SiO <sub>2</sub> | 15       | 1.7      | 0.058                                     | 34.3 <sup>e</sup>             |
| 15Co3.7Mn/SiO <sub>2</sub> | 15       | 3.7      | 0.057                                     | ---                           |
| 15Co5Mn/SiO <sub>2</sub>   | 15       | 5        | 0.063                                     | ---                           |
| 15Co15Mn/SiO <sub>2</sub>  | 15       | 15       | 0.093                                     | ---                           |

<sup>a</sup>50 mg sample; <sup>b</sup>cobalt reducibility; <sup>c</sup>calculated from the MnO<sub>2</sub> to MnO; <sup>d,e</sup>regardless of the reduction of MnO<sub>2</sub>.

**Table S7** The evolution of crystal facet and phase state of Co (Mn) over the 15Co3.7Mn/SiO<sub>2</sub> catalyst with TOS.

| Reaction time<br>(h)      | Nanoparticle                    | Crystal facet | Lattice distance (nm)      |                         |
|---------------------------|---------------------------------|---------------|----------------------------|-------------------------|
|                           |                                 |               | From XRD data <sup>a</sup> | From HRTEM <sup>b</sup> |
| Reduced sample<br>(t = 0) | Co                              | (111) major   | 0.205                      | 0.209                   |
|                           | CoO                             | (200)         | 0.213                      | 0.214                   |
| Spent sample<br>(t = 2)   | Co                              | (111) major   | 0.205                      | 0.204                   |
|                           | Co <sub>3</sub> C               | (101) minor   | 0.205                      | 0.208                   |
|                           | CoO                             | (200)         | 0.213                      | 0.214                   |
|                           | MnO                             | (200)         | 0.222                      | 0.223                   |
|                           | MnO <sub>2</sub>                | (130)         | 0.255                      | 0.251                   |
| Spent sample<br>(t = 20)  | Co                              | (111) minor   | 0.205                      | 0.205                   |
|                           | Co <sub>3</sub> C               | (101) major   | 0.205                      | 0.206                   |
|                           | CoO                             | (200)         | 0.213                      | 0.217                   |
|                           | MnO                             | (200)         | 0.222                      | 0.223                   |
|                           | MnO <sub>2</sub>                | (111)         | 0.234                      | 0.235                   |
|                           | Mn <sub>23</sub> C <sub>6</sub> | (511)         | 0.204                      | 0.207                   |
|                           | CoMnO <sub>3</sub>              | (104)         | 0.267                      | 0.264                   |

Reaction conditions: T = 230 °C, P = 10 bar, H<sub>2</sub>/CO = 2, GHSV = 4.5 L g<sub>cat</sub><sup>-1</sup> h<sup>-1</sup>. <sup>a</sup>corresponding to Figure 7 (a); <sup>b</sup>corresponding to Figure 4 (c, d) and Figure S8 (a-g).
